# Supplementary material for: Directed evolution of mevalonate kinase inEscherichia coliby random mutagenesis for improved lycopene
Source: Royal Society of Chemistry journal article supplement (doi:10.1039/c8ra01783b), 2018-01-01
Supplement: c8ra01783b1.pdf [file c8ra01783b1.pdf]

**Electronic Supplementary Material (ESI) for RSC Advances.**

**This journal is © The Royal Society of Chemistry 2018**

**Supporting information**

**Directed evolution of Mevalonate Kinase in *Escherichia coli* by random mutagenesis  
for improved lycopene production**

Hailin Chen,<sup>ab</sup> Changqing Liu,<sup>a</sup> Meijie Li,<sup>a</sup> Haibo Zhang,<sup>\*a</sup> Mo Xian,<sup>\*a</sup> and Huizhou Liu<sup>a</sup>

a. CAS Key Laboratory of Bio-based Materials, Qingdao Institute of Bioenergy and  
Bioprocess Technology, Chinese Academy of Sciences, No.189 Songling Road, Qingdao  
266101, People's Republic of China

b. Sino-Danish College, University of Chinese Academy of Sciences, No.19(A) Yuquan Road,  
Beijing 100049, People's Republic of China

## **Experimental details**

### **Protein expression and purification**

MK was expressed and purified from *E. coli* BL21(DE3) cells harboring the plasmid pET-MK. The bacterial strain with MK mutations were used to inoculate LB medium which was maintained at 37°C until the optical density at 600 nm (OD<sub>600</sub>) reached between 0.6 and 0.8 units. 0.2 mM IPTG was used to induce recombinant protein expression at 20°C. Cells were pelleted after 20 h by centrifugation at 10,000*g* and resuspended in 50 mM phosphate buffer (pH 7.4) containing 4 mM β-mercaptoethanol. Sonication was used to lyse the cells (3 s pulses with 3 s intervals between cycles at 60% output) at 4°C for a total of 40 min. Lysed cells were then clarified by centrifugation at 18,000*g* for 10 min, with samples kept at 4°C. A 0.22 μm PALL filter was used to further clarify the supernatant then loaded onto a nickel affinity chromatography column, which was pre-washed with 10 ml water and equilibrated with 10 ml binding buffer. Recombinant protein labelled with a 6 His-tag was able to bind to the nickel ions within the column. Sequential washing with 10 ml washing buffer 1 removed unbound protein from the column, while washing Buffer 2 was used to remove nonspecific or weakly interacting, contaminating proteins. 10 ml elution fractions were collected and the concentration of each fraction was determined with the BCA protein assay quantification kit as per the manufacturer's instructions. Recombinant protein was stored at -20°C after being flash frozen in liquid nitrogen.

### **Lycopene quantification assay**

Lycopene was extracted from cellular fractions of each bacterial culture immediately after total glucose exhaustion. After washing, the pellet was extracted using acetone (1 ml) at 55°C and under intermittent vortexing for 15 min. The lycopene content in the supernatant was quantified by determination of the absorbance at 475 nm and calculated according to a

standard curve. Extractions were completed in the dark to prevent photo-bleaching and degradation.

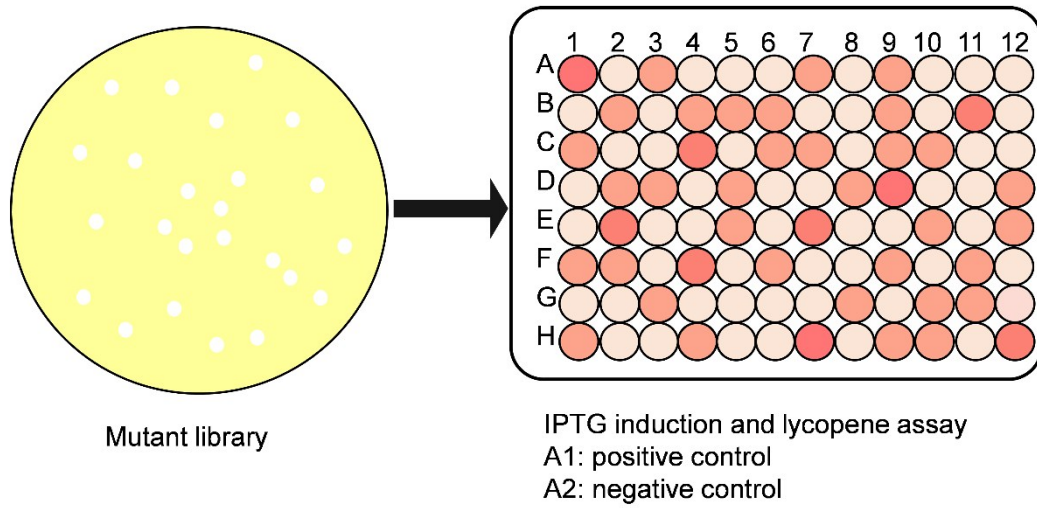

**Figure S1.** A two-step procedure for screening the MK with improved lycopene production. Negative control: colonies with deactivated MK; positive control: colonies with activated MK.

**Table S1.** Strains and plasmids used in this study.

| Strain/plasmid<br>/primer      | Descriptions                                                                                                                                                                                                                                                                 | Reference  |
|--------------------------------|------------------------------------------------------------------------------------------------------------------------------------------------------------------------------------------------------------------------------------------------------------------------------|------------|
| Strains                        |                                                                                                                                                                                                                                                                              |            |
| <i>E. coli</i><br>BL21(DE3)    | <i>E. coli</i> str. B F <sup>-</sup> <i>ompT gal dcm lon hsdS<sub>B</sub>(r<sub>B</sub><sup>-</sup>m<sub>B</sub><sup>-</sup>)</i><br>$\lambda$ (DE3[ <i>lacI lacUV5-T7p07 ind1 sam7 nin5</i> ]) [ <i>malB</i> <sup>+</sup> ] <sub>K</sub> .<br><sub>12</sub> ( $\lambda^S$ ) | Invitrogen |
| <i>E. coli</i><br>DH5 $\alpha$ | F <sup>-</sup> <i>endA1 glnV44 thi-1 recA1 relA1 gyrA96 deoR nupG purB20 <math>\phi</math>80dlacZ<math>\Delta</math>M1</i><br><i>5<math>\Delta</math>(lacZYA-argF)U169, hsdR17(r<sub>K</sub><sup>-</sup>m<sub>K</sub><sup>+</sup>), <math>\lambda^-</math></i>               | Invitrogen |
| CHL-1                          | BL21(DE3)/pET-CHL/pAC-LYC/ pCLpTrcUpper                                                                                                                                                                                                                                      | This work  |
| CHL-2                          | BL21(DE3)/pET-CHL-MK (V13D/S148I/V301E)/pAC-LYC/ pCLpTrcUpper                                                                                                                                                                                                                | This work  |
| plasmids                       |                                                                                                                                                                                                                                                                              |            |
| pETDeu-1                       | Ampicillin resistant; T7 promoter; has encoded N-terminal His6 tag                                                                                                                                                                                                           | Invitrogen |
| pET-CHL1                       | pETDeu-1 derivative carrying genes gene <i>ERG8</i> , T7 promoter, Ap <sup>R</sup>                                                                                                                                                                                           | This work  |
| pET-CHL2                       | pETDeu-1 derivative carrying genes gene <i>ERG8</i> and <i>ERG19</i> , T7 promoter, Ap <sup>R</sup>                                                                                                                                                                          | This work  |
| pET-CHL3                       | pETDeu-1 derivative carrying genes gene <i>ERG8</i> , <i>ERG19</i> and <i>ERG12</i> , T7 promoter, Ap <sup>R</sup>                                                                                                                                                           | This work  |
| pET-CHL                        | pETDeu-1 derivative carrying genes gene <i>ERG8</i> , <i>ERG19</i> , <i>ERG12</i> and <i>IDI</i> , T7 promoter, Ap <sup>R</sup>                                                                                                                                              | This work  |
| pET-MK                         | pET28a(+) derivative carrying genes gene <i>ERG12</i> , T7 promoter, Kan <sup>R</sup>                                                                                                                                                                                        | This work  |

---

|              |                                                                                                              |
|--------------|--------------------------------------------------------------------------------------------------------------|
| pCLpTrcUpper | pETDeu-1 derivative carrying genes <i>mvaE</i> and <i>mvaS</i> , T7 promoter, Spc <sup>R</sup>               |
| pAC-LYC      | pACYCDuet-1 derivative carrying genes <i>crtE</i> , <i>crtI</i> , <i>crtB</i> , T7 promoter, Cm <sup>R</sup> |
| Primers      |                                                                                                              |
| ERG12_F      | 5'-ACGCGTCGACTCATTACCGTTCTTAACTTC-3'                                                                         |
| ERG12_R      | 5'-ATTTGCGGCCGCTTATGAAGTCCATGGTAAAT-3'                                                                       |
| ERG8_F       | 5'-GGAAGATCTCTCAGAGTTGAGAGCCTTCAG-3'                                                                         |
| ERG8_R       | 5'-GGGCCGACGTCTTATTTATCAAGATAAGTTT-3'                                                                        |
| ERG19_F      | 5'-TCGCGACGTCACCGTTTACACAGCATCCGT-3'                                                                         |
| ERG19_R      | 5'-CCGCTCGAGTTATTCCTTTGGTAGACCAG-3'                                                                          |
| IDI_F        | 5'-CGAGCTCGACTGCCGACAACAATAGTAT-3'                                                                           |
| IDI_R        | 5'-ACGCGTCGACTTATAGCATTCTATGAATTT-3'                                                                         |
| V13-F        | 5'-GCACCGGAAAGNNKATTATTTTTGGTG-3'                                                                            |
| V13-R        | 5'-CACCAAAAATAATKNNCTTTCCCGGTGC-3'                                                                           |
| S148-F       | 5'-GGTGCTGGGTGGGCNNKAGCGCCTCTATTTTC-3'                                                                       |
| S148-R       | 5'-GAAATAGAGGCGCTKNNGCCCAACCCAGCACC-3'                                                                       |
| V301-F       | 5'-CGATGACGAGGCTGNNKAAACTAATAATGAAC-3'                                                                       |
| V301-R       | 5'-GTTTCATTATTAGTTTKNNCAGCCTCGTCATCG-3'                                                                      |
| V13D-F       | 5'-CTTCTGCACCGGAAAGGATATTATTTTTGGTGAAC-3'                                                                    |
| V13D-R       | 5'-GTTCCACCAAAAATAATATCCTTTCCCGGTGCAGAAG-3'                                                                  |
| S148I-F      | 5'-GTGCTGGGTGGGCATCAGCGCCTCTATTTTC-3'                                                                        |
| S148I-R      | 5'-GAAATAGAGGCGCTGATGCCCAACCCAGCAC-3'                                                                        |
| V301E-F      | 5'-CACCGATGACGAGGCTGAAGAACTAATAATGAAC-3'                                                                     |
| V301E-R      | 5'-GTTTCATTATTAGTTTCTTCAGCCTCGTCATCGGTG-3'                                                                   |

---

**Table S2** Sequencing results of mutants.

| <b>Cycles</b> | <b>Mutant nucleotide bases</b> | <b>Mutant amino acids</b> |
|---------------|--------------------------------|---------------------------|
| 1             | T38A                           | V13D                      |
| 2             | T38A/T442G                     | V13D/S148A                |
| 3             | T38A/T442G/T902A               | V13D/S148A/V301E          |

**Table S3.** The results of three-cycles of random mutagenesis

| <b>First cycle</b> |                   | <b>Second cycle</b> |                   | <b>Third cycle</b> |                   |
|--------------------|-------------------|---------------------|-------------------|--------------------|-------------------|
| No.                | OD <sub>475</sub> | No.                 | OD <sub>475</sub> | No.                | OD <sub>475</sub> |
| 1                  | 0.56              | 1                   | 0.81              | 1                  | 1.28              |
| 2                  | 0.56              | 2                   | 0.81              | 2                  | 1.28              |
| 3                  | 0.56              | 3                   | 0.81              | 3                  | 1.28              |
| 4                  | 0.56              | 4                   | 0.81              | 4                  | 1.28              |
| 5                  | 0.56              | 5                   | 0.81              | 5                  | 1.28              |
| 6                  | 0.56              | 6                   | 0.81              | 6                  | 1.28              |
| 7                  | 0.56              | 7                   | 0.81              | 7                  | 1.28              |
| 8                  | 0.56              | 8                   | 0.81              | 8                  | 1.28              |
| 9                  | 0.56              | 9                   | 0.81              | 9                  | 1.28              |
| 10                 | 0.56              | 10                  | 0.81              | 10                 | 1.28              |
| 11                 | 0.58              | 11                  | 0.81              | 11                 | 1.28              |
| 12                 | 0.59              | 12                  | 0.81              | 12                 | 1.28              |
| 13                 | 0.61              | 13                  | 0.81              | 13                 | 1.28              |
| 14                 | 0.62              | 14                  | 0.81              | 14                 | 1.28              |
| 15                 | 0.81              | 15                  | 0.86              | 15                 | 1.28              |
| 16                 | 0.83              | 16                  | 1.08              | 16                 | 1.28              |

|          |      |          |      |          |      |
|----------|------|----------|------|----------|------|
| 17       | 0.84 | 17       | 1.13 | 17       | 1.28 |
| 18       | 0.84 | 18       | 1.19 | 18       | 1.33 |
| 19       | 0.84 | 19       | 1.19 | 19       | 1.45 |
| 20       | 0.84 | 20       | 1.19 | 20       | 1.45 |
| Control1 | 0.55 | Control1 | 0.55 | Control1 | 0.55 |
| Control2 | 0.49 | Control2 | 0.57 | Control2 | 0.60 |
| Control3 | 0.64 | Control3 | 0.50 | Control3 | 0.59 |

**Table S4.** The results of saturation mutagenesis at residues V13, S148 and V301

| <b>V13X</b> |                   | <b>S148X</b> |                   | <b>V301X</b> |                   |
|-------------|-------------------|--------------|-------------------|--------------|-------------------|
| No.         | OD <sub>475</sub> | No.          | OD <sub>475</sub> | No.          | OD <sub>475</sub> |
| 1           | 0.48              | 1            | 0.54              | 1            | 0.34              |
| 2           | 0.48              | 2            | 0.54              | 2            | 0.34              |
| 3           | 0.48              | 3            | 0.59              | 3            | 0.34              |
| 4           | 0.54              | 4            | 0.59              | 4            | 0.34              |
| 5           | 0.54              | 5            | 0.59              | 5            | 0.46              |
| 6           | 0.54              | 6            | 0.62              | 6            | 0.46              |
| 7           | 0.6               | 7            | 0.62              | 7            | 0.46              |
| 8           | 0.6               | 8            | 0.65              | 8            | 0.57              |
| 9           | 0.6               | 9            | 0.65              | 9            | 0.57              |
| 10          | 0.6               | 10           | 0.68              | 10           | 0.57              |
| 11          | 0.63              | 11           | 0.68              | 11           | 0.57              |
| 12          | 0.63              | 12           | 0.70              | 12           | 0.63              |
| 13          | 0.63              | 13           | 0.70              | 13           | 0.63              |
| 14          | 0.66              | 14           | 0.76              | 14           | 0.63              |

|          |      |          |      |          |      |
|----------|------|----------|------|----------|------|
| 15       | 0.66 | 15       | 0.76 | 15       | 0.68 |
| 16       | 0.78 | 16       | 0.81 | 16       | 0.70 |
| 17       | 0.83 | 17       | 0.81 | 17       | 0.71 |
| 18       | 0.81 | 18       | 0.92 | 18       | 0.74 |
| 19       | 0.96 | 19       | 0.95 | 19       | 0.78 |
| 20       | 0.99 | 20       | 0.97 | 20       | 0.80 |
| Control1 | 0.58 | Control1 | 0.51 | Control1 | 0.58 |
| Control2 | 0.61 | Control2 | 0.56 | Control2 | 0.53 |
| Control3 | 0.61 | Control3 | 0.55 | Control3 | 0.60 |

**Table S5.** The result of combinatorial site-specific saturation

| No.              | OD <sub>475</sub> |
|------------------|-------------------|
| V13D             | 0.93              |
| S148I            | 1.22              |
| V301E            | 0.79              |
| V13D/S148I       | 1.34              |
| V13D/V301E       | 1.07              |
| S148I/V301E      | 1.22              |
| V13D/S148I/V301E | 1.59              |
| Control1         | 0.65              |
| Control2         | 0.58              |
| Control3         | 0.60              |

**Table S6.** Effect of temperature on triple-mutant MK activity

|                       |
|-----------------------|
| MK (V13D/S148I/V301E) |
|-----------------------|



| Temperature(°C) | Absolute activity (U/mg) |      |       | Relative activity (%) |      |       |      |     |
|-----------------|--------------------------|------|-------|-----------------------|------|-------|------|-----|
|                 | #1                       | #2   | #3    | #1                    | #2   | #3    | mean | SD  |
| 25              | 96.1                     | 86.1 | 93    | 87.1                  | 87.3 | 89.9  | 88.1 | 1.6 |
| 30              | 102.7                    | 90.1 | 89.5  | 93.1                  | 91.2 | 86.6  | 90.3 | 3.4 |
| 35              | 110.3                    | 98.6 | 103.4 | 100.0                 | 100  | 100.0 | 100  | 0.0 |
| 40              | 96.6                     | 82.0 | 79.1  | 87.6                  | 83.1 | 76.5  | 82.4 | 5.6 |
| 45              | 82.8                     | 67.2 | 70.5  | 75.1                  | 68.2 | 68.2  | 70.5 | 4.0 |
| 50              | 60.8                     | 61.0 | 60.3  | 55.1                  | 61.8 | 58.1  | 58.3 | 3.4 |
| 55              | 47.4                     | 35.9 | 42.4  | 43.2                  | 36.4 | 41.0  | 39.8 | 3.4 |

**Table S7.** Effect of temperature on wild-type MK activity

| MK              |                          |      |      |                       |       |       |       |     |
|-----------------|--------------------------|------|------|-----------------------|-------|-------|-------|-----|
| Temperature(°C) | Absolute activity (U/mg) |      |      | Relative activity (%) |       |       |       |     |
|                 | #1                       | #2   | #3   | #1                    | #2    | #3    | mean  | SD  |
| 25              | 43.1                     | 41.1 | 44.2 | 81.2                  | 84.1  | 75.9  | 80.4  | 4.2 |
| 30              | 48.7                     | 41.7 | 46.7 | 91.7                  | 85.3  | 80.1  | 85.7  | 5.8 |
| 35              | 53.1                     | 48.9 | 58.3 | 100.0                 | 100.0 | 100.0 | 100.0 | 0.0 |
| 40              | 42.5                     | 35.3 | 47.8 | 80.1                  | 72.2  | 82.0  | 78.1  | 5.2 |
| 45              | 36.1                     | 31.8 | 40.6 | 68.0                  | 65.2  | 68.9  | 67.3  | 2.1 |
| 50              | 19.5                     | 20.1 | 21.9 | 36.8                  | 41.1  | 37.6  | 38.5  | 2.3 |
| 55              | 10.6                     | 8.3  | 11.0 | 20.2                  | 16.9  | 18.9  | 18.6  | 1.6 |

**Table S8.** Effect of temperature on triple-mutant MK stability

| MK (V13D/S148I/V301E) |                   |                       |
|-----------------------|-------------------|-----------------------|
| Temperature(°C)       | Absolute activity | Residual activity (%) |

| )  | (U/mg) |       |       |       |       |       | mean | SD  |
|----|--------|-------|-------|-------|-------|-------|------|-----|
|    | #1     | #2    | #3    | #1    | #2    | #3    |      |     |
| 25 | 117.7  | 112.8 | 125.7 | 100.0 | 99.5  | 100.0 | 99.8 | 0.3 |
| 30 | 116.2  | 113.4 | 125.1 | 98.7  | 100.0 | 99.5  | 99.4 | 0.7 |
| 35 | 115.7  | 112.4 | 124.1 | 98.3  | 99.1  | 98.6  | 98.7 | 0.4 |
| 40 | 100.0  | 98.7  | 104.1 | 84.9  | 87.0  | 82.8  | 84.9 | 2.1 |
| 45 | 77.2   | 72.7  | 78.7  | 65.6  | 64.1  | 62.6  | 64.1 | 1.5 |
| 50 | 44.3   | 38.2  | 44.9  | 37.6  | 33.8  | 35.7  | 35.7 | 1.9 |
| 55 | 26.1   | 28.6  | 35.4  | 22.2  | 25.2  | 28.2  | 25.2 | 3.0 |

**Table S9.** Effect of temperature on wild-type MK stability

| Temperature(°C) | MK                       |      |      |                       |       |       |       |     |
|-----------------|--------------------------|------|------|-----------------------|-------|-------|-------|-----|
|                 | Absolute activity (U/mg) |      |      | Residual activity (%) |       |       |       |     |
|                 | #1                       | #2   | #3   | #1                    | #2    | #3    | mean  | SD  |
| 25              | 50.1                     | 57.6 | 45.9 | 98.1                  | 100.0 | 100.0 | 99.3  | 1.1 |
| 30              | 50.9                     | 57.2 | 45.2 | 100.0                 | 99.3  | 98.5  | 99.3  | 0.8 |
| 35              | 50.6                     | 57.0 | 45.7 | 99.5                  | 99.1  | 99.6  | 100.0 | 0.3 |
| 40              | 40.5                     | 45.1 | 35.1 | 79.6                  | 78.6  | 76.4  | 78.2  | 1.6 |
| 45              | 18.7                     | 23.1 | 18.3 | 36.7                  | 40.1  | 39.9  | 38.9  | 1.9 |
| 50              | 13.9                     | 17.6 | 13.5 | 27.3                  | 30.5  | 29.5  | 29.1  | 1.6 |
| 55              | 8.7                      | 8.4  | 6.6  | 17.0                  | 14.5  | 14.3  | 15.3  | 1.5 |

**Table S10.** Effect of pH on triple-mutant MK activity

| pH | MK (V13D/S148I/V301E)    |  |  |                       |  |
|----|--------------------------|--|--|-----------------------|--|
|    | Absolute activity (U/mg) |  |  | Relative activity (%) |  |

|     | #1   | #2   | #3   | #1    | #2    | #3    | mean  | SD  |
|-----|------|------|------|-------|-------|-------|-------|-----|
| 5   | 17.5 | 18.2 | 15.5 | 17.3  | 20.1  | 17.3  | 18.2  | 1.6 |
| 5.5 | 33.0 | 23.2 | 28.6 | 33.4  | 25.6  | 31.9  | 30.3  | 4.1 |
| 6   | 49.8 | 51.4 | 41.1 | 50.5  | 56.7  | 45.8  | 51.0  | 5.5 |
| 6.5 | 59.7 | 57.9 | 61.2 | 60.5  | 63.9  | 68.2  | 64.2  | 3.9 |
| 7   | 87.5 | 77.6 | 85.8 | 88.7  | 85.7  | 95.6  | 90.0  | 5.1 |
| 7.5 | 98.7 | 90.6 | 89.7 | 100.0 | 100.0 | 100.0 | 100.0 | 0.0 |
| 8   | 91.9 | 85.9 | 78.6 | 93.1  | 94.8  | 87.6  | 91.8  | 3.8 |
| 8.5 | 65.6 | 61.0 | 64.7 | 66.5  | 67.3  | 72.1  | 68.6  | 3.0 |
| 9   | 59.7 | 48.2 | 46.6 | 60.5  | 53.2  | 52.0  | 55.2  | 4.6 |
| 9.5 | 43.2 | 38.1 | 39.9 | 43.8  | 42.2  | 44.5  | 43.4  | 1.3 |
| 10  | 28.5 | 33.3 | 27.4 | 28.9  | 36.7  | 30.5  | 32.0  | 4.1 |

**Table S11.** Effect of pH on wild-type MK activity

| MK  |                          |      |      |                       |       |       |       |     |
|-----|--------------------------|------|------|-----------------------|-------|-------|-------|-----|
| pH  | Absolute activity (U/mg) |      |      | Relative activity (%) |       |       |       |     |
|     | #1                       | #2   | #3   | #1                    | #2    | #3    | mean  | SD  |
| 5   | 5.9                      | 6.0  | 6.4  | 14.4                  | 15.1  | 13.9  | 14.5  | 0.6 |
| 5.5 | 8.2                      | 6.6  | 8.7  | 20.1                  | 16.7  | 19.0  | 18.6  | 1.7 |
| 6   | 13.4                     | 10.7 | 14.4 | 32.7                  | 26.9  | 31.5  | 30.4  | 3.1 |
| 6.5 | 20.0                     | 14.7 | 17.7 | 49.0                  | 36.9  | 38.7  | 41.5  | 6.5 |
| 7   | 32.3                     | 31.9 | 35.6 | 78.9                  | 80.1  | 77.8  | 78.9  | 1.2 |
| 7.5 | 40.9                     | 39.8 | 45.7 | 100.0                 | 100.0 | 100.0 | 100.0 | 0.0 |
| 8   | 36.2                     | 33.2 | 41.2 | 88.5                  | 83.4  | 90.1  | 87.3  | 3.5 |
| 8.5 | 28.0                     | 27.7 | 30.4 | 68.4                  | 69.5  | 66.6  | 68.2  | 1.5 |

|     |      |      |      |      |      |      |      |     |
|-----|------|------|------|------|------|------|------|-----|
| 9   | 20.5 | 17.8 | 25.1 | 50.1 | 44.7 | 54.9 | 49.9 | 5.1 |
| 9.5 | 18.2 | 19.9 | 20.9 | 44.5 | 50.1 | 45.7 | 46.8 | 2.9 |
| 10  | 9.6  | 11.8 | 11.7 | 23.4 | 29.7 | 25.6 | 26.2 | 3.2 |

**Table S12.** Effect of pH on triple-mutant MK stability

| MK (V13D/S148I/V301E) |                          |       |       |                       |       |       |       |     |
|-----------------------|--------------------------|-------|-------|-----------------------|-------|-------|-------|-----|
| pH                    | Absolute activity (U/mg) |       |       | Residual activity (%) |       |       |       |     |
|                       | #1                       | #2    | #3    | #1                    | #2    | #3    | mean  | SD  |
| 5                     | 13.0                     | 16.6  | 20.8  | 12.3                  | 16.5  | 20.1  | 16.3  | 3.9 |
| 5.5                   | 20.9                     | 20.6  | 24.1  | 19.8                  | 20.5  | 23.2  | 21.2  | 1.8 |
| 6                     | 42.7                     | 38.9  | 31.2  | 40.5                  | 38.6  | 30.1  | 36.4  | 5.5 |
| 6.5                   | 60.2                     | 53.8  | 67.8  | 57.1                  | 53.4  | 65.4  | 58.6  | 6.1 |
| 7                     | 92.6                     | 89.6  | 93.4  | 87.9                  | 89.0  | 90.1  | 89.0  | 1.1 |
| 7.5                   | 105.4                    | 100.7 | 103.7 | 100.0                 | 100.0 | 100.0 | 100.0 | 0.0 |
| 8                     | 99.4                     | 98.8  | 94.6  | 94.3                  | 98.1  | 91.2  | 94.5  | 3.5 |
| 8.5                   | 94.3                     | 84.0  | 96.3  | 89.5                  | 83.4  | 92.9  | 88.6  | 4.8 |
| 9                     | 71.1                     | 73.2  | 66.4  | 67.5                  | 72.7  | 64.0  | 68.1  | 4.4 |
| 9.5                   | 48.0                     | 35.8  | 42.2  | 45.5                  | 35.6  | 40.7  | 40.6  | 5.0 |
| 10                    | 18.7                     | 23.6  | 21.3  | 17.7                  | 23.4  | 20.5  | 20.5  | 2.9 |

**Table S13.** Effect of pH on wild-type MK stability

| MK |                          |     |     |                       |      |      |      |     |
|----|--------------------------|-----|-----|-----------------------|------|------|------|-----|
| pH | Absolute activity (U/mg) |     |     | Residual activity (%) |      |      |      |     |
|    | #1                       | #2  | #3  | #1                    | #2   | #3   | mean | SD  |
| 5  | 6.8                      | 5.3 | 7.6 | 13.5                  | 10.9 | 16.7 | 13.7 | 2.9 |

|     |      |      |      |       |       |       |       |     |
|-----|------|------|------|-------|-------|-------|-------|-----|
| 5.5 | 10.7 | 9.2  | 8.6  | 21.1  | 19.0  | 18.9  | 19.7  | 1.2 |
| 6   | 16.9 | 12.9 | 16.1 | 33.4  | 26.7  | 35.4  | 31.8  | 4.6 |
| 6.5 | 18.8 | 16.8 | 16.2 | 37.1  | 34.7  | 35.5  | 35.8  | 1.2 |
| 7   | 40.5 | 36.3 | 34.4 | 79.9  | 75.2  | 75.4  | 76.8  | 2.7 |
| 7.5 | 50.7 | 48.3 | 45.6 | 100.0 | 100.0 | 100.0 | 100.0 | 0.0 |
| 8   | 45.2 | 42.7 | 38.3 | 89.1  | 88.5  | 84.1  | 87.2  | 2.7 |
| 8.5 | 43.4 | 41.7 | 36.5 | 85.6  | 86.3  | 80.1  | 84.0  | 3.4 |
| 9   | 30.7 | 30.6 | 28.3 | 60.5  | 63.4  | 62.0  | 62.0  | 1.5 |
| 9.5 | 23.2 | 17.2 | 17.6 | 45.8  | 35.7  | 38.7  | 40.1  | 5.2 |
| 10  | 6.7  | 7.6  | 8.8  | 13.2  | 15.8  | 19.4  | 16.1  | 3.1 |

**Table S14.** The result of cell growth rates of CHL-1 and CHL-2

| Time (h) | OD <sub>600</sub> of CHL-1 |    |    |      |     | OD <sub>600</sub> of CHL-2 |    |    |      |     |
|----------|----------------------------|----|----|------|-----|----------------------------|----|----|------|-----|
|          | #1                         | #2 | #3 | mean | SD  | #1                         | #2 | #3 | mean | SD  |
| 0        | 0                          | 0  | 0  | 0.0  | 0.0 | 0                          | 0  | 0  | 0.0  | 0.0 |
| 15       | 19                         | 23 | 21 | 21.0 | 2.0 | 18                         | 19 | 20 | 19.0 | 1.0 |
| 20       | 41                         | 40 | 43 | 41.3 | 1.5 | 39                         | 44 | 38 | 40.3 | 3.2 |
| 25       | 48                         | 50 | 45 | 47.7 | 2.5 | 54                         | 52 | 48 | 51.3 | 3.1 |
| 30       | 51                         | 54 | 51 | 52.0 | 1.7 | 58                         | 65 | 61 | 61.3 | 3.5 |
| 35       | 58                         | 61 | 59 | 59.3 | 1.5 | 61                         | 62 | 63 | 62.0 | 1.0 |
| 40       | 68                         | 63 | 64 | 65.0 | 2.6 | 67                         | 70 | 65 | 67.3 | 2.5 |
| 45       | 70                         | 71 | 67 | 69.3 | 2.1 | 70                         | 71 | 70 | 70.3 | 0.6 |
| 50       | 70                         | 71 | 70 | 70.3 | 0.6 | 72                         | 71 | 73 | 72.0 | 1.0 |
| 55       | 73                         | 72 | 75 | 73.3 | 1.5 | 72                         | 74 | 73 | 73.0 | 1.0 |
| 60       | 75                         | 78 | 74 | 75.7 | 2.1 | 75                         | 75 | 76 | 75.3 | 0.6 |

|    |    |    |    |      |     |    |    |    |      |     |
|----|----|----|----|------|-----|----|----|----|------|-----|
| 65 | 79 | 80 | 78 | 79.0 | 1.0 | 73 | 73 | 75 | 73.7 | 1.2 |
| 70 | 81 | 81 | 80 | 80.7 | 0.6 | 74 | 72 | 76 | 74.0 | 2.0 |
| 75 | 84 | 80 | 79 | 81.0 | 2.6 | 75 | 76 | 76 | 75.7 | 0.6 |
| 80 | 82 | 81 | 83 | 82.0 | 1.0 | 75 | 74 | 77 | 75.3 | 1.5 |
| 85 | 80 | 79 | 83 | 80.7 | 2.1 | 76 | 77 | 74 | 75.7 | 1.5 |
| 90 | 82 | 84 | 83 | 83.0 | 1.0 | 79 | 78 | 76 | 77.7 | 1.5 |

**Table S15.** Lycopene titer during aerobic fed-batch fermentation of CHL-1 and CHL-2

| Time (h) | Lycopene titer of CHL-1(mg/L) |       |       |       |      | Lycopene titer of CHL-2(mg/L) |        |        |        |     |
|----------|-------------------------------|-------|-------|-------|------|-------------------------------|--------|--------|--------|-----|
|          | #1                            | #2    | #3    | mean  | SD   | #1                            | #2     | #3     | mean   | SD  |
| 0        | 0                             | 0     | 0     | 0.0   | 0.0  | 0                             | 0      | 0      | 0      | 0.0 |
| 15       | 0                             | 0     | 0     | 0.0   | 0.0  | 0                             | 0      | 0      | 0      | 0.0 |
| 20       | 32.5                          | 37.5  | 27.5  | 32.5  | 5.0  | 78.5                          | 80.3   | 81.1   | 80.1   | 1.3 |
| 25       | 106.3                         | 109.5 | 101.3 | 105.7 | 4.1  | 210.3                         | 205.6  | 207.1  | 207.2  | 2.4 |
| 30       | 274.8                         | 275.5 | 269.8 | 273.4 | 3.1  | 386.6                         | 381.9  | 394.3  | 386.6  | 6.3 |
| 35       | 412.4                         | 422.3 | 407.4 | 414.0 | 7.6  | 556.4                         | 553.9  | 560.8  | 556.4  | 3.5 |
| 40       | 540.2                         | 544.1 | 535.2 | 539.8 | 4.5  | 755.8                         | 760.2  | 751.7  | 755.8  | 4.3 |
| 45       | 623.4                         | 637.8 | 618.4 | 626.5 | 10.1 | 885.9                         | 891.1  | 890.2  | 890.2  | 2.8 |
| 50       | 656.7                         | 665.1 | 651.7 | 657.8 | 6.8  | 1017.5                        | 1015.7 | 1020.1 | 1017.5 | 2.2 |
| 55       | 691                           | 699.2 | 686   | 692.1 | 6.7  | 1152.3                        | 1148.7 | 1144.5 | 1144.1 | 3.9 |
| 60       | 714.6                         | 710.6 | 709.6 | 711.6 | 2.6  | 1224.5                        | 1229.6 | 1225.5 | 1224.8 | 2.7 |
| 65       | 735.6                         | 739.1 | 730.6 | 735.1 | 4.3  | 1271.4                        | 1270.9 | 1275.9 | 1272.3 | 2.8 |
| 70       | 736                           | 739.8 | 731   | 735.6 | 4.4  | 1339.7                        | 1338.4 | 1331.4 | 1335.1 | 4.5 |
| 75       | 731.4                         | 734.1 | 726.4 | 730.6 | 3.9  | 1340.2                        | 1355.8 | 1351.2 | 1351   | 8.0 |
| 80       | 728.4                         | 737.7 | 723.4 | 729.8 | 7.3  | 1394.5                        | 1390.2 | 1393.8 | 1391.6 | 2.3 |
| 85       | 726.6                         | 728.8 | 721.6 | 725.7 | 3.7  | 1431.5                        | 1435.2 | 1438.2 | 1431   | 3.4 |

90      720.8   725.1   715.8   720.6   4.7   1431.2   1435.9   1436.2   1431.2   2.8

**Table S16.** Lycopene production during aerobic fed-batch fermentation of CHL-1 and CHL-2

| Time<br>(h) | Lycopene production of CHL-1 (mg/g DCW) |      |      |      |      | Lycopene production of CHL-2 (mg/g DCW) |       |       |       |      |
|-------------|-----------------------------------------|------|------|------|------|-----------------------------------------|-------|-------|-------|------|
|             | #1                                      | #2   | #3   | mean | SD   | #1                                      | #2    | #3    | mean  | SD   |
|             | 0                                       | 0    | 0    | 0    | 0.00 | 0.00                                    | 0     | 0     | 0     | 0.00 |
| 15          | 0.45                                    | 0.43 | 0.41 | 0.43 | 0.03 | 0.35                                    | 0.36  | 0.4   | 0.37  | 0.03 |
| 20          | 0.83                                    | 0.79 | 0.81 | 0.81 | 0.02 | 0.73                                    | 1.72  | 1.24  | 1.23  | 0.50 |
| 25          | 2.19                                    | 1.73 | 1.25 | 1.72 | 0.47 | 2.7                                     | 3.64  | 3.21  | 3.18  | 0.47 |
| 30          | 4.59                                    | 4.21 | 3.65 | 4.15 | 0.47 | 5.66                                    | 6.52  | 6.09  | 6.09  | 0.43 |
| 35          | 7.06                                    | 6.61 | 6.03 | 6.57 | 0.52 | 8.72                                    | 9.64  | 9.02  | 9.13  | 0.47 |
| 40          | 7.15                                    | 6.57 | 6.11 | 6.61 | 0.52 | 9.48                                    | 10.64 | 10.03 | 10.05 | 0.58 |
| 45          | 7.23                                    | 6.69 | 6.25 | 6.72 | 0.49 | 10.74                                   | 11.6  | 11.02 | 11.12 | 0.44 |
| 50          | 7.35                                    | 6.9  | 6.29 | 6.85 | 0.53 | 12.06                                   | 13.02 | 12.61 | 12.56 | 0.48 |
| 55          | 7.52                                    | 7.05 | 6.51 | 7.03 | 0.51 | 12.96                                   | 13.8  | 13.51 | 13.42 | 0.43 |
| 60          | 7.84                                    | 7.38 | 6.83 | 7.35 | 0.51 | 13.54                                   | 14.71 | 14.02 | 14.09 | 0.59 |
| 65          | 8.05                                    | 7.52 | 7.01 | 7.53 | 0.52 | 15.49                                   | 16.24 | 15.81 | 15.85 | 0.38 |
| 70          | 8.65                                    | 8.08 | 7.69 | 8.14 | 0.48 | 17.2                                    | 18.37 | 17.91 | 17.83 | 0.59 |
| 75          | 8.51                                    | 8.13 | 7.71 | 8.12 | 0.40 | 18.62                                   | 19.84 | 19.17 | 19.21 | 0.61 |
| 80          | 8.69                                    | 8.31 | 7.75 | 8.25 | 0.47 | 18.86                                   | 19.72 | 19.48 | 19.35 | 0.44 |
| 85          | 8.81                                    | 8.33 | 7.81 | 8.32 | 0.50 | 18.9                                    | 20.03 | 19.65 | 19.53 | 0.58 |
| 90          | 8.91                                    | 7.89 | 8.15 | 8.32 | 0.53 | 19.34                                   | 20.21 | 19.91 | 19.83 | 0.44 |
